# Supplementary material for: Cost-Effectiveness of a National Sugar-Sweetened Beverage Tax to Reduce Cancer Burdens and Disparities in the United States
Source: PubMed Central journal article supplement — JNCI Cancer Spectr. 2020 Aug 25;4(6):pkaa073. doi: 10.1093/jncics/pkaa073 (PMC7771430; doi:10.1093/jncics/pkaa073), 2020-08-25
Supplement: pkaa073_supplementary_data.pdf [file pkaa073_supplementary_data.pdf]

## Supplementary Materials

### Supplemental Methods

#### **Definition of Sugar-Sweetened Beverages and Methods of Estimating Sugar-Sweetened Beverage Consumption Among US Adults**

We defined sugar-sweetened beverages (SSBs) as any non-alcoholic, carbonated or non-carbonated, packaged (bottled) and reconstituted beverage with any added “caloric” sweetener.<sup>1</sup> This definition includes soft drinks, carbonated drinks, energy drinks, sports drinks, fruit drinks, and other beverages with added sugars (**Supplementary Table 1**). We further defined “caloric” as  $\geq 5$  grams of added sugar per 12-ounce serving ( $\geq 20$  kcal per 12-ounce). This definition aligns with thresholds used to define SSBs in existing SSB taxes throughout the United States (US) (**Supplementary Table 2**).

In NHANES, the amount of beverages consumed is estimated as grams consumed per day, and the amount of added sugar consumed is estimated as teaspoons per day. We converted the beverage size from grams to ounces and converted the added sugar unit from teaspoons to grams. We then estimated the consumption of SSBs in 8-ounce serving among US adults in 32 population subgroups by age (20-44, 45-54, 55-64, 65+ years), sex, and race/ethnicity (non-Hispanic white, non-Hispanic black, Hispanic, and other) using 24-hour dietary recall data collected among participants of the two most recent cycles of the National Health and Nutrition Examination Survey (NHANES) 2013-2016 (**Supplementary Table 3**).<sup>2</sup> The NHANES is designed to be a nationally representative survey based on a multistage and stratified area

probability sample of non-institutionalized U.S. households.<sup>3</sup> Trained interviewers collected dietary information on all foods and beverages consumed during the previous 24 hours with the use of a computer-assisted dietary interview system that included a multiple-pass format with standardized probes.<sup>4,5</sup> To correct for measurement error associated with the use of one or two-day diet recalls estimating usual intake, we used the National Cancer Institute (NCI) method to estimate the usual intake distribution by strata.<sup>6</sup>

### **Methods of Estimating Effect Sizes of Implementing Sugar-Sweetened Beverage Tax on Intake Among US Adults**

We identified the best available estimates of implementing SSB tax on intake based on food price intervention studies including studies assessing SSB tax and price elasticity modeling using the national data.<sup>7-12</sup> Because the effect sizes vary by income, we obtained estimates separately for high *versus* low-income individuals whenever possible. The following three studies served as the basis for deriving the best available estimates of implementing SSB tax on intake.

The first study is a meta-analysis of 23 interventional studies and 7 prospective cohorts that evaluated the impact of the food price change on consumption by Afshin et al. The results of this meta-analysis suggested a 6.74% reduction in SSB intake per 10% increase in price.<sup>7</sup> However, this meta-analysis did not present effect size estimates by income level.

The second study is a systematic review and meta-analysis of food price elasticity modeling studies using nationally represented data for different countries by Green et al.<sup>12</sup> This study evaluated food price elasticities by income level of a country (high versus low-income country).

The findings suggested that an increase in food price results in a greater reduction in consumption in low-income than high-income countries for nearly all foods evaluated. Among the 21 high-income countries, an average price elasticity (for sweets, confectionery, and SSB combined) was -0.73, corresponding to a 7.3% reduction in intake per 10% price increase.

The third study is a price elasticity modeling study conducted among the US population and by levels of income by Wada et al.<sup>11</sup> This study used nationally representative data of soda consumption and price to estimate the associations between regular soda price and soda intake as well as total caloric intake from soda by age, race/ethnicity, and income-based socioeconomic status (SES). They reported a price elasticity of -0.66 for the total US population and -1.025 for low-income individuals versus -0.505 for other individuals.

We used the effect size estimates from the study by Wade et al because they provide the effect size estimates by income level based on nationally representative data of US adults. Similar estimates for the total population from Wade et al to the national price elasticity reported by other meta-analyses support the use of effect size estimates from Wade et al for our study.

Using these estimates, we estimated that implementing a national penny-per-ounce SSB tax would result in a 10.8% decrease in SSB consumption among the total US adult population. The effect size was estimated to be higher among low-income individuals (16.8%) and lower among high-income individuals (8.3%) (**Supplementary Table 4**).

Various SSB taxes have also been implemented in multiple US jurisdictions, including penny-per-ounce SSB tax in Berkley and Oakland, California, and Cook County, Illinois; 1.5 cents-per-ounce SSB tax in Philadelphia, Pennsylvania; 1.75 cents-per-ounce SSB tax in Seattle; Washington; and 2 cents-per-ounce SSB tax in Boulder, Colorado.<sup>10,13-17</sup> Previous studies have evaluated the impact of these SSB taxes on reducing SSB consumption or purchases. However, earlier studies did not account for cross-border shopping, which may lead to an overestimation of the policy effect. We assessed the evidence from three studies that explicitly adjusted for cross-border shopping in reported estimates: (1) in Philadelphia, the tax resulted in a 51% decrease in total SSB volume sales. However, sales also increased in border zip codes, offsetting the decrease in Philadelphia by 24.4%. This led to a net reduction of 38% in total SSB volume sales. With a pass-through rate ranging from 43.1% in supermarkets to 104% in pharmacies, this net reduction is equivalent to a 17% reduction in SSB volume sales per 10% price increase;<sup>13</sup> (2) in Cook County, the tax resulted in a 27% reduction in SSB sales. After cross-border adjustment, the reduction was 21%. With a 114% pass-through rate, this net reduction corresponds to an 8% reduction in SSB sales per 10% price increase;<sup>15</sup> (3) in Seattle, tax resulted in a 22% reduction in SSB sales with no clear evidence of cross-border shopping occurring in Seattle's border area. With a 59% pass-through rate, this corresponds to an 11% reduction in SSB sales per 10% price increase.<sup>16</sup> To summarize the empirical evidence, we calculated the weighted average of these three studies using the baseline SSB volume sales as the weight. The weighted average was 11.4%, corresponding to an average of 11.4% reduction in SSB sales per 10% price increase. We model the policy effect using 11.4% as the policy effect estimate in a sensitivity analysis (**Supplementary Table 8**). Because the empirical evidence did not provide separate estimates

for the higher vs. low-income population, the sensitivity analysis was conducted among the total US adult population only.

### **Cancer Incidence and Mortality for 13 Cancers Among US Adults**

We obtained cancer incidence for 13 cancers among US adults in 32 population subgroups by age (20-44, 45-54, 55-64, 65+ years), sex, and race/ethnicity (non-Hispanic white, non-Hispanic black, Hispanic, and other) in 2015 from the Surveillance, Epidemiology, and End Results (SEER) database and the Centers for Disease Control and Prevention's National Program of Cancer Registries (NPCR) database.<sup>18</sup> To project cancer incidence in future years, we first calculated the average annual percent change (AAPC) by fitting a regression line to the natural logarithm of the age-adjusted incidence rates in years 2006 through 2015 ( $y$ ):  $\ln(I) = \alpha + \beta y$ , where  $\alpha$  and  $\beta$  are coefficients to be estimated,  $y$  is the calendar year, and  $I$  is the incidence rate from 2006 to 2015.<sup>19,20</sup> To project future cancer incidence from 2016 to 2030, we assume that the trend of cancer incidence follows the same AAPC from 2016 to 2030.<sup>19</sup> We held the cancer incidence constant for all subsequent years after 2030 because the validity of using the AAPC method for long-term projection has not been established.<sup>20</sup>

We obtained the five-year relative survival for 13 cancers among US adults in 32 population subgroups in 2014 estimated using the period analysis method from the Surveillance, Epidemiology, and End Results (SEER) database.<sup>18</sup> The relative survival is a net survival measure representing cancer survival in the absence of other causes of death, defined as the ratio of the proportion of observed survivors in a cohort of cancer patients to the proportion of expected survivors in a comparable set of cancer-free individuals.<sup>21</sup> The period analysis method

enhances the use of the most up-to-date survival data by deriving the survival rate estimates exclusively from the survival experience of patients within the most recent calendar period.<sup>22,23</sup>

### **Methods for Estimating Health-Related Quality of Life for 13 Cancers**

We searched the Tufts Medical Center Cost-Effectiveness Analysis (CEA) Registry database to identify the health-related quality of life (HRQOL) for the 13 cancer types. The following search string was used for each cancer type: ("health related quality of life" OR "HRQOL" OR "quality of life" OR "QOL" OR "preference weight\*" OR "utility weight\*" OR "health state utility\*" OR "health utility\*") AND ("cancer of interest") AND ("cancer" OR "neoplasm\*") AND ("review" OR "systematic review"). When an appropriate systematic review was identified, we read the articles included in the systematic review and determined if the paper met the following data needs. We used the following criteria to determine whether the HRQOL reported in a particular study or systematic review shall be considered for our study, including whether the cancer type included in the published study was specific to the cancer type of our interest, whether a US sample was used to estimate HRQOL; whether the EQ-5D was used to assess HRQOL, and whether phase-specific HRQOL was available. HRQOL ranging from 0 (dead) to 1 (perfect health) was extracted by phase of care (initial, continuous, end of life) whenever possible. When the phase-specific HRQOL was not available, we assumed the same HRQOL for each phase (Supplementary Table 5).

### **Methods for Estimating the Cost of Implementing National Sugar-Sweetened Beverage Tax in the US**

We estimated the cost of implementing national penny-per-ounce SSB tax in two components: (a) the government tax collection costs and (b) the industry compliance costs. The total cost was

assumed to be 2% of the SSB tax revenue, and the cost for each component was divided equally between the government and industry with a 3% annual discounting rate (**Supplementary Table 6**).

We considered the implementation cost as a function of tax revenue, and the government tax collection cost is equal to the industry tax compliance cost based on current literature. The Organization for Economic Co-operation and Development (OECD) reported a cost collection ratio (the ratio of administrative cost to net revenue) ranging from 0.47% to 0.66% in the US although this estimate did not account for industry compliance cost.<sup>24</sup> The Brookings Institute estimated that the government collection cost and the cost taxpayers bear to comply with the tax code represented 3-5 % for value-added taxes and 2-5 % for sales taxes.<sup>25</sup> MUNI Services, a private firm contracted by the city of Berkeley to collect SSB tax revenue, charges 2% of the tax proceeds.<sup>26</sup> Based on the literature, we estimated the total implementation cost as 2% of SSB tax revenue, divided equally between government and industry.<sup>27</sup>

To estimate the SSB tax revenue, we first estimated the mean consumption of SSB consumption in 8-ounce servings post-tax using the effect size estimates described in Supplementary Method 2. We then multiplied the mean consumption by the US adult population and the average SSB price in 2015 (\$0.061 per ounce)<sup>28</sup> plus the additional \$0.01 added to each ounce of SSB consumption (post-tax price: \$0.071 in 2015 US dollars). Finally, we estimated 2% of the total SSB tax revenue as the cost of implementing the national penny-per-ounce SSB tax in the US. Using similar methods, we estimated the cost of implementing the SSB tax among low-income

and high-income individuals separately, taking into consideration of different effect size estimates by income (Supplementary Method 2) and different population sizes by income. All costs were estimated as the present value of the tax revenue in 2015 US dollars and discounted 3% annually.

### **Methods of Estimating Health-Related Costs Among Individuals with and without Cancer**

We estimated the annual health-related costs in three components: a) medical expenditure, b) productivity loss from missed workdays or disability, and c) patient time cost associated with receiving care. The health-related costs were estimated by age (under 65 vs. above 65 years old) and phase of care (three phases for individuals with cancer: initial, continuing, and end-year of life; two phases for individuals without cancer: general and end-year of life).

We extracted the raw data for each of the costing components from the published literature.<sup>29-34</sup> Because age-, sex-, and phase-specific data were not available for some specific cancer types such as postmenopausal breast cancer, advanced prostate cancer, esophageal adenocarcinoma, and stomach cancer (cardia), we assumed the cost of breast, prostate, esophageal, and stomach cancers apply to these specific types. For some cancers such as multiple myeloma, gallbladder, liver, and thyroid cancers, because the cost data cannot be identified from existing literature, we used the costs for all cancers combined to replace the costs for these cancers. When a specific costing component was not directly available for a specific cancer type, we made our estimation based on the best available evidence. For example, the annual productivity loss for colorectal cancer was reported as a percentage of total health-related costs.<sup>34</sup> We then multiplied the total health-related cost for colorectal cancer by the percentage to obtain the productivity loss cost for



colorectal cancer. For individuals without cancer, we assumed that the end-year life costs do not vary by the 32 subgroups.

To estimate the health-related costs in 2015, we assumed that there was an annual 2% increase in health-related expenditures in three phases of cancer care while the expenditure remained constant in the continuing phase of care. Based on this assumption, we applied a 2% increase annually in the three phases for medical expenditure, productivity loss, and patient time cost for cancer survivors, starting from the year in which the extracted data represented and lasting until 2015 to estimate the baseline health-related expenditures for cancer survivors. We used the same approach to estimate and project health-related expenditures for individuals without cancer.

To project future health-related costs, we assumed that the costs will increase by 2% from 2015 to 2025. Because the cost projection beyond 2025 may become less valid, we assumed no further increase in health-related costs after 2025. All health-related costs were inflated to 2015 US dollars using the Personal Health Care (PHC) index.

Supplementary Table 1. Inclusion and Exclusion of Beverages as Sugar-Sweetened Beverages

| Sugar-Sweetened Beverages ( $\geq 5$ grams of added sugar per 12 oz. serving)                                              |                                                 |
|----------------------------------------------------------------------------------------------------------------------------|-------------------------------------------------|
| Included (but not limited to)                                                                                              | Excluded                                        |
| Soft drinks                                                                                                                | Fluid replacement                               |
| Carbonated drinks                                                                                                          | 100% fruit, vegetable juice                     |
| Energy drinks                                                                                                              | baby food                                       |
| Vitamin water drinks                                                                                                       | coffee substitutes <sup>2</sup>                 |
| Water with caloric sweetener                                                                                               | Non-caloric artificially sweetened drinks.      |
| Sports drinks                                                                                                              | Alcoholic beverages.                            |
| Fruit drinks, fruit nectars, fruit squashes, lemonade, Frescas                                                             | 100% fruit and vegetable juice                  |
| Beverage, non-fruit                                                                                                        | Milk, milk-based drinks                         |
| Coconut beverages                                                                                                          | Water without any caloric sweeteners            |
| Presweetened iced tea <sup>1</sup>                                                                                         | Coffee, tea without added caloric sweeteners    |
| Presweetened iced coffee <sup>1</sup>                                                                                      | Dietary supplements, beverages for medical use. |
| Presweetened coffee <sup>1</sup>                                                                                           | Infant formula                                  |
| Punch and other non-alcoholic drinks with added sugar (e.g., alcohol-free wines, alcohol-free malt beverages - beer, etc.) | Dry concentrate if not-reconstituted            |

1. Presweetened coffee and tea were included if sugar was added during the processing of coffee or tea, but not added by consumers.

2. Coffee substitutes did not include added sugar, thus, we excluded.

Supplementary Table 2. Thresholds to Define Sugar-Sweetened Beverages in Existing Sugar-Sweetened Beverage Taxes

| Location and Effective date               | Tax Rate                | Threshold to Define Sugar Sweetened Beverages |
|-------------------------------------------|-------------------------|-----------------------------------------------|
| Berkeley, CA<br>(Enacted Mar 2015)        | 1 cent per ounce        | $\geq 2$ calories from added sugar per 1 oz.  |
| Navajo nation<br>(Enacted June 2016)      | 2% sales tax on<br>soda | $\geq 5$ g of added sugar per 12 oz           |
| Philadelphia, PA<br>(Enacted Jan 2017)    | 1.5 cent per ounce      | None (any content)                            |
| Boulder, CO<br>(Effective July 2017)      | 2 cent per ounce        | $\geq 5$ g of added sugar per 12 oz           |
| Oakland, CA<br>(Effective July 2017)      | 1 cent per ounce        | $\geq 25$ kcal per 12oz                       |
| Cook County, IL<br>(Effective July 2017)  | 1 cent per ounce        | None (any content)                            |
| San Francisco, CA<br>(Effective Jan 2018) | 1 cent per ounce        | $\geq 25$ kcal per 12oz                       |
| Seattle, WA<br>(Effective Jan 2018)       | 1.75 cent per ounce     | 40 kcal per 12 oz                             |
| Albany, CA<br>(Effective Apr 2017)        | 1 cent per ounce        | $\geq 2$ calories from added sugar per 1 oz.  |

Supplementary Table 3. Mean Consumption of Sugar-Sweetened Beverages Among US Adults by Age, Sex, Race/Ethnicity, and Income, NHANES 2013-2016

| Age groups, years | Sex    | Race/Ethnicity     | SSB Consumption, 8-oz servings/day, Mean (SE) <sup>1</sup> |                                                          |                                                      |
|-------------------|--------|--------------------|------------------------------------------------------------|----------------------------------------------------------|------------------------------------------------------|
|                   |        |                    | Total Population<br>(n= 235,162,844)                       | Higher-Income<br>Adults <sup>2</sup><br>(n= 156,383,293) | Low-Income<br>Adults <sup>2</sup><br>(n= 78,779,553) |
| 20-44             | Female | Non-Hispanic White | 1.17 (0.05)                                                | 1.01 (0.04)                                              | 1.49 (0.06)                                          |
|                   |        | Non-Hispanic Black | 1.65 (0.06)                                                | 1.47 (0.05)                                              | 1.78 (0.06)                                          |
|                   |        | Hispanic           | 1.41 (0.04)                                                | 1.31 (0.04)                                              | 1.48 (0.05)                                          |
|                   |        | Other              | 0.98 (0.06)                                                | 0.90 (0.06)                                              | 1.11 (0.06)                                          |
|                   | Male   | Non-Hispanic White | 1.94 (0.07)                                                | 1.77 (0.06)                                              | 2.35 (0.07)                                          |
|                   |        | Non-Hispanic Black | 2.15 (0.09)                                                | 2.09 (0.10)                                              | 2.22 (0.08)                                          |
|                   |        | Hispanic           | 2.30 (0.08)                                                | 2.23 (0.07)                                              | 2.35 (0.08)                                          |
|                   |        | Other              | 1.58 (0.10)                                                | 1.45 (0.10)                                              | 1.84 (0.10)                                          |
| 45-54             | Female | Non-Hispanic White | 1.01 (0.07)                                                | 0.84 (0.06)                                              | 1.60 (0.08)                                          |
|                   |        | Non-Hispanic Black | 1.17 (0.07)                                                | 1.18 (0.07)                                              | 1.16 (0.07)                                          |
|                   |        | Hispanic           | 1.04 (0.07)                                                | 0.86 (0.06)                                              | 1.25 (0.08)                                          |
|                   |        | Other              | 0.81 (0.11)                                                | 0.65 (0.07)                                              | 1.17 (0.17)                                          |
|                   | Male   | Non-Hispanic White | 1.49 (0.09)                                                | 1.35 (0.08)                                              | 2.10 (0.01)                                          |
|                   |        | Non-Hispanic Black | 1.59 (0.10)                                                | 1.48 (0.09)                                              | 1.77 (0.12)                                          |
|                   |        | Hispanic           | 1.52 (0.09)                                                | 1.25 (0.07)                                              | 1.78 (0.10)                                          |
|                   |        | Other              | 1.06 (0.12)                                                | 0.85 (0.07)                                              | 1.55 (0.18)                                          |
| 55-64             | Female | Non-Hispanic White | 0.76 (0.06)                                                | 0.70 (0.05)                                              | 0.94 (0.08)                                          |
|                   |        | Non-Hispanic Black | 1.15 (0.08)                                                | 1.03 (0.07)                                              | 1.31 (0.09)                                          |
|                   |        | Hispanic           | 0.79 (0.05)                                                | 0.70 (0.04)                                              | 0.88 (0.05)                                          |
|                   |        | Other              | 0.69 (0.09)                                                | 0.72 (0.08)                                              | 0.60 (0.11)                                          |
|                   | Male   | Non-Hispanic White | 1.27 (0.10)                                                | 1.18 (0.09)                                              | 1.58 (0.13)                                          |
|                   |        | Non-Hispanic Black | 1.48 (0.09)                                                | 1.43 (0.09)                                              | 1.55 (0.09)                                          |
|                   |        | Hispanic           | 1.34 (0.07)                                                | 1.20 (0.06)                                              | 1.49 (0.07)                                          |
|                   |        | Other              | 0.91 (0.10)                                                | 0.95 (0.11)                                              | 0.80 (0.09)                                          |
| ≥65               | Female | Non-Hispanic White | 0.48 (0.02)                                                | 0.40 (0.02)                                              | 0.68 (0.04)                                          |
|                   |        | Non-Hispanic Black | 0.67 (0.04)                                                | 0.72 (0.05)                                              | 0.61 (0.04)                                          |
|                   |        | Hispanic           | 0.73 (0.05)                                                | 0.61 (0.04)                                              | 0.79 (0.06)                                          |
|                   |        | Other              | 0.45 (0.07)                                                | 0.42 (0.06)                                              | 0.51 (0.09)                                          |
|                   | Male   | Non-Hispanic White | 0.75 (0.03)                                                | 0.69 (0.03)                                              | 0.98 (0.04)                                          |
|                   |        | Non-Hispanic Black | 0.99 (0.07)                                                | 0.93 (0.06)                                              | 1.09 (0.08)                                          |
|                   |        | Hispanic           | 0.92 (0.06)                                                | 0.78 (0.05)                                              | 1.00 (0.06)                                          |
|                   |        | Other              | 0.85 (0.10)                                                | 0.90 (0.09)                                              | 0.73 (0.10)                                          |

Abbreviations: SSB, sugar-sweetened beverages; SE, standard error; NHANES, National Health and Nutrition Examination Survey

1. SSBs were defined as any non-alcoholic, carbonated or non-carbonated, beverages with added caloric sweetener including sodas, energy drinks, sports drinks, and fruit drinks.

2. Low-income (Federal poverty-to-income ratio (PIR) ≤1.85), Higher-income (Federal poverty-to-income ratio (PIR) >1.85).

Supplementary Table 4. Change in Sugar-Sweetened Beverage Consumption After Implementation of a National Penny-Per-Oz Sugar-Sweetened Beverage Tax Among US Adults by Income

| Population              | Price Elasticity <sup>1</sup><br>(1) | Price of SSB<br>per oz <sup>2</sup><br>(2) | Price of<br>SSB per oz<br>with Tax <sup>3</sup><br>(3) | Percent<br>Increase<br>in Price<br>with Tax<br>(4) | Percent Decrease<br>in Intakes<br>with Tax<br>(5) |
|-------------------------|--------------------------------------|--------------------------------------------|--------------------------------------------------------|----------------------------------------------------|---------------------------------------------------|
| Total US Adults         | -0.66                                | \$0.061                                    | \$0.071                                                | 16.4%                                              | 10.8%                                             |
| Low-Income Individuals  | -1.025                               | \$0.061                                    | \$0.071                                                | 16.4%                                              | 16.8%                                             |
| High-Income Individuals | -0.505                               | \$0.061                                    | \$0.071                                                | 16.4%                                              | 8.3%                                              |

1. Price elasticity is defined as the change in intake (oz.) per 1 percent change in price. Prior literature suggests a higher price elasticity among low-income individuals compared to high-income individuals.

2. Price of SSB per oz. is inflated to 2015 US dollars.

3. Price of SSB per oz. with tax is estimated as the price of SSB per oz before tax + \$0.01 (penny-per-ounce tax).

4. Percent increase in price due to tax is calculated as (the price with tax – the price before tax) / the price with tax × 100%.

5. Percent decrease in SSB intake after implementing the tax is calculated as (1) × (4)/0.01.

Supplementary Table 5. Health-Related Quality of Life (HRQOL) Estimates for 13 Cancer Types

| Health-Related Quality of Life  | Phase        | HRQOL        | Source                               |
|---------------------------------|--------------|--------------|--------------------------------------|
| Female Breast (post-menopausal) | Initial:     | 0.78 (0.19)  | Yabroff et al. <sup>35</sup>         |
|                                 | Continuous:  | 0.81 (0.20)  |                                      |
|                                 | End of Life: | 0.64 (0.16)  |                                      |
| Colorectal                      | Initial:     | 0.760 (0.19) | Färkkilä et al. <sup>36</sup>        |
|                                 | Continuous:  | 0.835 (0.20) |                                      |
|                                 | End of Life: | 0.643 (0.26) |                                      |
| Advanced Prostate               | Initial:     | 0.78 (0.20)  | Yabroff et al. <sup>35</sup>         |
|                                 | Continuous:  | 0.76 (0.19)  |                                      |
|                                 | End of Life: | 0.59 (0.15)  |                                      |
| Stomach (gastric cardia)        | Initial:     | 0.84 (0.25)  | Zhou et al. <sup>37</sup>            |
|                                 | Continuous:  | 0.86 (0.24)  |                                      |
|                                 | End of Life: | 0.65 (0.33)  |                                      |
| Endometrial                     | Overall      | 0.80 (0.14)  | Naik et al. <sup>38</sup>            |
| Esophageal Adenocarcinoma       | Overall      | 0.69 (0.26)  | Wildi et al. <sup>39</sup>           |
| Kidney                          | Overall      | 0.78 (0.14)  | Pickard et al. <sup>40</sup>         |
| Liver                           | Overall      | 0.79 (0.19)  | Naik et al. <sup>38</sup>            |
| Gallbladder                     | Overall      | 0.79 (0.19)  | Naik et al. <sup>38</sup>            |
| Pancreas                        | Overall      | 0.65 (0.30)  | Müller-Nordhorn et al. <sup>41</sup> |
| Multiple myeloma                | Overall      | 0.79 (0.19)  | Naik et al. <sup>38</sup>            |
| Thyroid                         | Overall      | 0.85 (0.13)  | Naik et al. <sup>38</sup>            |
| Ovary                           | Overall      | 0.77 (0.17)  | Pickard et al. <sup>40</sup>         |

Supplementary Table 6. Relative Risk (RR) Estimates of Etiologic Relationships between Obesity and Cancer

| Cancer Type                    | No. of Studies | No. of Events | Source     | Evidence Grading              | RR (95% CI)<br>Per 5 kg/m <sup>2</sup> of<br>Body Mass Index | Statistical Heterogeneity         |
|--------------------------------|----------------|---------------|------------|-------------------------------|--------------------------------------------------------------|-----------------------------------|
| Corpus uteri                   | 26             | 18,717        | CUP, 2013  | Convincing<br>↑risk           | 1.50 (1.42-1.59)                                             | I <sup>2</sup> =86.2%<br>P<0.0001 |
| Esophageal<br>(adenocarcinoma) | 9              | 1,725         | CUP, 2016  | Convincing<br>↑risk           | 1.48 (1.35-1.62)                                             | I <sup>2</sup> =36.7%<br>P=0.13   |
| Kidney                         | 23             | 15,575        | CUP, 2015  | Convincing<br>↑risk           | 1.30 (1.25-1.35)                                             | I <sup>2</sup> =38.8%<br>P=0.03   |
| Liver                          | 12             | 14,311        | CUP, 2015  | Convincing<br>↑risk           | 1.30 (1.16-1.46)                                             | I <sup>2</sup> =78.3%<br>P=0.000  |
| Gallbladder                    | 8              | 6,004         | CUP, 2015  | Probable<br>↑risk             | 1.25 (1.15-1.37)                                             | I <sup>2</sup> =52.3%<br>P=0.04   |
| Stomach (cardia)               | 7              | 2,050         | CUP, 2016  | Probable<br>↑risk             | 1.23 (1.07-1.40)                                             | I <sup>2</sup> =55.6%<br>P=0.04   |
| Breast (post-<br>menopausal)   | 56             | 80,404        | CUP, 2017  | Convincing<br>↑risk           | 1.12 (1.09-1.15)                                             | I <sup>2</sup> =75%<br>P<0.001    |
| Pancreas                       | 23             | 9,504         | CUP, 2011  | Convincing<br>↑risk           | 1.10 (1.07-1.14)                                             | I <sup>2</sup> =19%<br>P=0.20     |
| Multiple myeloma               | 20             | 1,388         | IARC, 2016 | Sufficient<br>(IRAC)<br>↑risk | 1.09 (1.03-1.16)                                             | Not reported                      |
| Prostate (advanced)            | 24             | 11,149        | CUP, 2014  | Probable<br>↑risk             | 1.08 (1.04-1.12)                                             | I <sup>2</sup> =18.8%<br>P=0.21   |
| Thyroid                        | 22             | 3,100         | IARC, 2016 | Sufficient<br>(IARC)<br>↑risk | 1.06 (1.02-1.10)                                             | Not reported                      |
| Ovary                          | 25             | 15,899        | CUP, 2013  | Probable<br>↑risk             | 1.06 (1.02-1.11)                                             | I <sup>2</sup> =55.1%<br>P=0.001  |
| Colorectal                     | 38             | 71,089        | CUP, 2017  | Convincing<br>↑risk           | 1.05 (1.03-1.07)                                             | I <sup>2</sup> =74.2%<br>P=0.000  |

Abbreviations: CUP: Continuous Update Project; RR: relative risk; IARC: International Agency for Research on Cancer

Supplementary Table 7. Estimated Costs of Implementing a Penny-Per-Ounce National Sugar-Sweetened Beverage Tax in the United States

|                                  | Expenditure on<br>SSBs | Expenditure on<br>SSBs with Tax | Total SSB<br>Tax Revenue | 2% SSB Tax<br>Revenue |
|----------------------------------|------------------------|---------------------------------|--------------------------|-----------------------|
| <b>Total US Adult Population</b> |                        |                                 |                          |                       |
| Per Person Per Day               | \$0.504                | \$0.587                         | \$0.083                  | \$0.001               |
| Per Person Per Year              | \$184.15               | \$214.34                        | \$30.19                  | \$0.604               |
| <b>High-Income Individuals</b>   |                        |                                 |                          |                       |
| Per Person Per Day               | \$0.419                | \$0.489                         | \$0.069                  | \$0.001               |
| Per Person Per Year              | \$153.36               | \$178.51                        | \$25.14                  | \$0.503               |
| <b>Low-Income Individuals</b>    |                        |                                 |                          |                       |
| Per Person Per Day               | \$0.648                | \$0.753                         | \$0.106                  | \$0.002               |
| Per Person Per Year              | \$236.52               | \$275.29                        | \$38.77                  | \$0.775               |

Abbreviations: SSB, sugar sweetened beverages



Supplementary Table 8. Estimated Health Gains, Costs, and Cost-Effectiveness of a Penny-Per-Ounce National Sugar-Sweetened Beverage Tax on Reducing Cancer Burden Among US Adults Aged 20 years, Using Empirical Evidence of Policy Effect

|                                                       | Total US Adults<br>(n= 235,162,844) |
|-------------------------------------------------------|-------------------------------------|
|                                                       | Median (95% UI)                     |
| Overall health outcomes                               |                                     |
| New cancer cases prevented                            | 38,970 (32,105, 47,480)             |
| Cancer deaths averted                                 | 23,718 (19,408, 28,838)             |
| Life years saved                                      | 107,701 (87,521, 132,007)           |
| QALYs gained                                          | 154,208 (125,713, 188,568)          |
| Policy implementation costs, \$ millions <sup>1</sup> |                                     |
| Government administration costs                       | 1,704 (1,502, 1,948)                |
| Industry compliance costs                             | 1,695 (1,476, 1,955)                |
| Cancer-related health costs, \$ millions              |                                     |
| Direct medical costs                                  | -2,819 (-3,431, -2,321)             |
| Productivity loss costs                               | -477 (-608, -356)                   |
| Patient time costs                                    | -109 (-138, -85)                    |
| Net Costs, \$ millions <sup>2</sup>                   |                                     |
| Government affordability perspective                  | -1,112 (-1,738, -548)               |
| Societal perspective <sup>2</sup>                     | -683 (-1,619, 142)                  |
| ICER, \$                                              |                                     |
| Government affordability perspective <sup>1</sup>     | cost-saving                         |
| Societal perspective <sup>2</sup>                     | cost-saving                         |

Abbreviations: ICER, incremental cost-effectiveness ratio; QALYs, quality-adjusted life years; UI, uncertainty interval

1. Empirical evidence was derived using xxx. or (11.4% Reduction in SSB Sales for 10% Increase in Price) explain in the footnote the methods briefly, refer to supplementary method for the calculation of weighted average.

2. Policy implementation costs represent the net present value over a lifetime with a 3% discount rate. The tax policy was assumed to have a one-time effect on reducing SSB consumption that lasts for subsequent years with no further reduction.

3. The government affordability perspective reflects the difference between the government costs for implementing the policy and direct healthcare costs saved for cancer care. The societal perspective reflects the difference between the policy implementation costs (including both government administration costs and industry compliance costs) and the health-related costs saved (including direct healthcare costs, productivity loss costs, and patient time costs).

Supplementary Table 9. Estimated Health Gains, Costs, and Cost-Effectiveness of a Penny-Per-Ounce National Sugar-Sweetened Beverage Tax on Reducing Cancer Burden Among US Adults Aged 20 years or Above Over a Lifetime, Assuming No Time Trends in Cancer Incidence

|                                                             | Total US Adults<br>(n= 235,162,844) | Low- Income Adults <sup>1</sup><br>(n= 78,779,553) | Higher-Income Adults <sup>1</sup><br>(n= 156,383,293) |
|-------------------------------------------------------------|-------------------------------------|----------------------------------------------------|-------------------------------------------------------|
|                                                             | Median (95% UI)                     |                                                    |                                                       |
| <b>Overall health outcomes</b>                              |                                     |                                                    |                                                       |
| New cancer cases prevented                                  | 16,954 (12,570, 21,828)             | 11,547 (9,585, 13,856)                             | 8,748 (6,037, 12,011)                                 |
| Cancer deaths averted                                       | 9,361 (6,949, 12,120)               | 6,449 (5,253, 7,716)                               | 4,735 (3,349, 6,450)                                  |
| Life years saved                                            | 29,436 (21,326, 33,784)             | 20,030 (16,599, 23,729)                            | 16,938 (11,763, 23,247)                               |
| QALYs gained                                                | 46,498 (33,784, 60,464)             | 31,346 (25,982, 37,689)                            | 27,099 (18,518, 37,434)                               |
| <b>Policy implementation costs, \$ millions<sup>2</sup></b> |                                     |                                                    |                                                       |
| Government administration costs                             | 1,718 (1,514, 1,966)                | 676 (591, 782)                                     | 1,008 (887, 1,142)                                    |
| Industry compliance costs                                   | 1,709 (1,489, 1,972)                | 672 (581, 780)                                     | 1,002 (877, 1,144)                                    |
| <b>Cancer-related health costs, \$ millions</b>             |                                     |                                                    |                                                       |
| Direct medical costs                                        | -1,006 (-1,316, -730)               | -642 (-760, -536)                                  | -604 (-850, -413)                                     |
| Productivity loss costs                                     | -408 (-540, -288)                   | -275 (-329, -227)                                  | -245 (-343, -167)                                     |
| Patient time costs                                          | -71 (-94, -49)                      | -48 (-57, -39)                                     | -43 (-60, -28)                                        |
| <b>Net Costs, \$ millions<sup>3</sup></b>                   |                                     |                                                    |                                                       |
| Government affordability perspective                        | 714 (356, 1,085)                    | 35 (-108, 172)                                     | 397 (149, 629)                                        |
| Societal perspective <sup>3</sup>                           | 1,953 (1,384, 2,496)                | 382 (189, 603)                                     | 1,120 (737, 1,453)                                    |
| <b>ICER, \$</b>                                             |                                     |                                                    |                                                       |
| Government affordability perspective <sup>2</sup>           | 15,340 (6,105, 30,511)              | 1,067 (-3,082, 6,375)                              | 14,659 (4,157, 33,182)                                |
| Societal perspective <sup>3</sup>                           | 42,359 (23,757, 71,788)             | 12,149 (5,324, 21,820)                             | 41,174 (19,547, 76,340)                               |

Abbreviations: ICER, incremental cost-effectiveness ratio; QALYs, quality-adjusted life years; UI, uncertainty interval

1. Low-income was defined as the federal poverty-to-income ratio (PIR)  $\leq 1.85$ , and higher-income was defined as PIR  $> 1.85$ .

2. Policy implementation costs represent the net present value over a lifetime with a 3% discount rate. The tax policy was assumed to have a one-time effect on reducing SSB consumption that lasts for subsequent years with no further reduction.

3. The government affordability perspective reflects the difference between the government costs for implementing the policy and direct healthcare costs saved for cancer care. The societal perspective reflects the difference between the policy implementation costs (including both government administration costs and industry compliance costs) and the health-related costs saved (including direct healthcare costs, productivity loss costs, and patient time costs).

Supplementary Table 10. Estimated Health Gains, Costs, and Cost-Effectiveness of a Penny-Per-Ounce National Sugar-Sweetened Beverage Tax on Reducing Cancer Burden Among US Adults Aged 20 years or Above Over 15 Years

|                                                             | Total US Adults<br>(n= 235,162,844) | Low- Income Adults <sup>1</sup><br>(n= 78,779,553) | Higher-Income Adults <sup>1</sup><br>(n= 156,383,293) |
|-------------------------------------------------------------|-------------------------------------|----------------------------------------------------|-------------------------------------------------------|
|                                                             | Median (95% UI)                     |                                                    |                                                       |
| <b>Overall health outcomes</b>                              |                                     |                                                    |                                                       |
| New cancer cases prevented                                  | 5,206 (3,699, 6,880)                | 3,000 (2,456, 3,629)                               | 2,918 (1,803, 4,054)                                  |
| Cancer deaths averted                                       | 1,445 (967, 1,948)                  | 871 (714, 1,054)                                   | 852 (488, 1,217)                                      |
| Life years saved                                            | 3,182 (2,106, 4,343)                | 1,906 (1,552, 2,315)                               | 1,861 (1,033, 2,680)                                  |
| QALYs gained                                                | 9,823 (6,919, 13,468)               | 5,745 (4,680, 7,109)                               | 5,629 (3,372, 7,988)                                  |
| <b>Policy implementation costs, \$ millions<sup>2</sup></b> |                                     |                                                    |                                                       |
| Government administration costs                             | 959 (845, 1,068)                    | 369 (324, 423)                                     | 573 (511, 640)                                        |
| Industry compliance costs                                   | 963 (852, 1,081)                    | 369 (326, 426)                                     | 573 (513, 646)                                        |
| <b>Cancer-related health costs, \$ millions</b>             |                                     |                                                    |                                                       |
| Direct medical costs                                        | -443 (-587, -306)                   | -257 (-309, -213)                                  | -255 (-356, -148)                                     |
| Productivity loss costs                                     | -131 (-177, -91)                    | -77 (-94, -63)                                     | -76 (-106, -45)                                       |
| Patient time costs                                          | -19 (-26, -12)                      | -11 (-14, -9)                                      | -11 (-16, -7)                                         |
| <b>Net Costs, \$ millions<sup>3</sup></b>                   |                                     |                                                    |                                                       |
| Government affordability perspective                        | 520 (321, 693)                      | 111 (41, 185)                                      | 317 (197, 446)                                        |
| Societal perspective <sup>3</sup>                           | 1,331 (1,077, 1,573)                | 392 (298, 496)                                     | 806 (640, 975)                                        |
| <b>ICER, \$</b>                                             |                                     |                                                    |                                                       |
| Government affordability perspective <sup>2</sup>           | 53,406 (25,613, 95,732)             | 19,293 (6,382, 37,358)                             | 56,362 (25,674, 127,454)                              |
| Societal perspective <sup>3</sup>                           | 136,837 (84,127, 219,067)           | 68,004 (43,948, 102,180)                           | 143,756 (82,277, 281,671)                             |

Abbreviations: ICER, incremental cost-effectiveness ratio; QALYs, quality-adjusted life years; UI, uncertainty interval

1. Low-income was defined as the federal poverty-to-income ratio (PIR)  $\leq 1.85$ , and higher-income was defined as PIR  $> 1.85$ .

2. Policy implementation costs represent the net present value over 15 years with a 3% discount rate. The tax policy was assumed to have a one-time effect on reducing SSB consumption that lasts for subsequent years with no further reduction.

3. The government affordability perspective reflects the difference between the government costs for implementing the policy and direct healthcare costs saved for cancer care. The societal perspective reflects the difference between the policy implementation costs (including both government administration costs and industry compliance costs) and the health-related costs saved (including direct healthcare costs, productivity loss costs, and patient time costs).

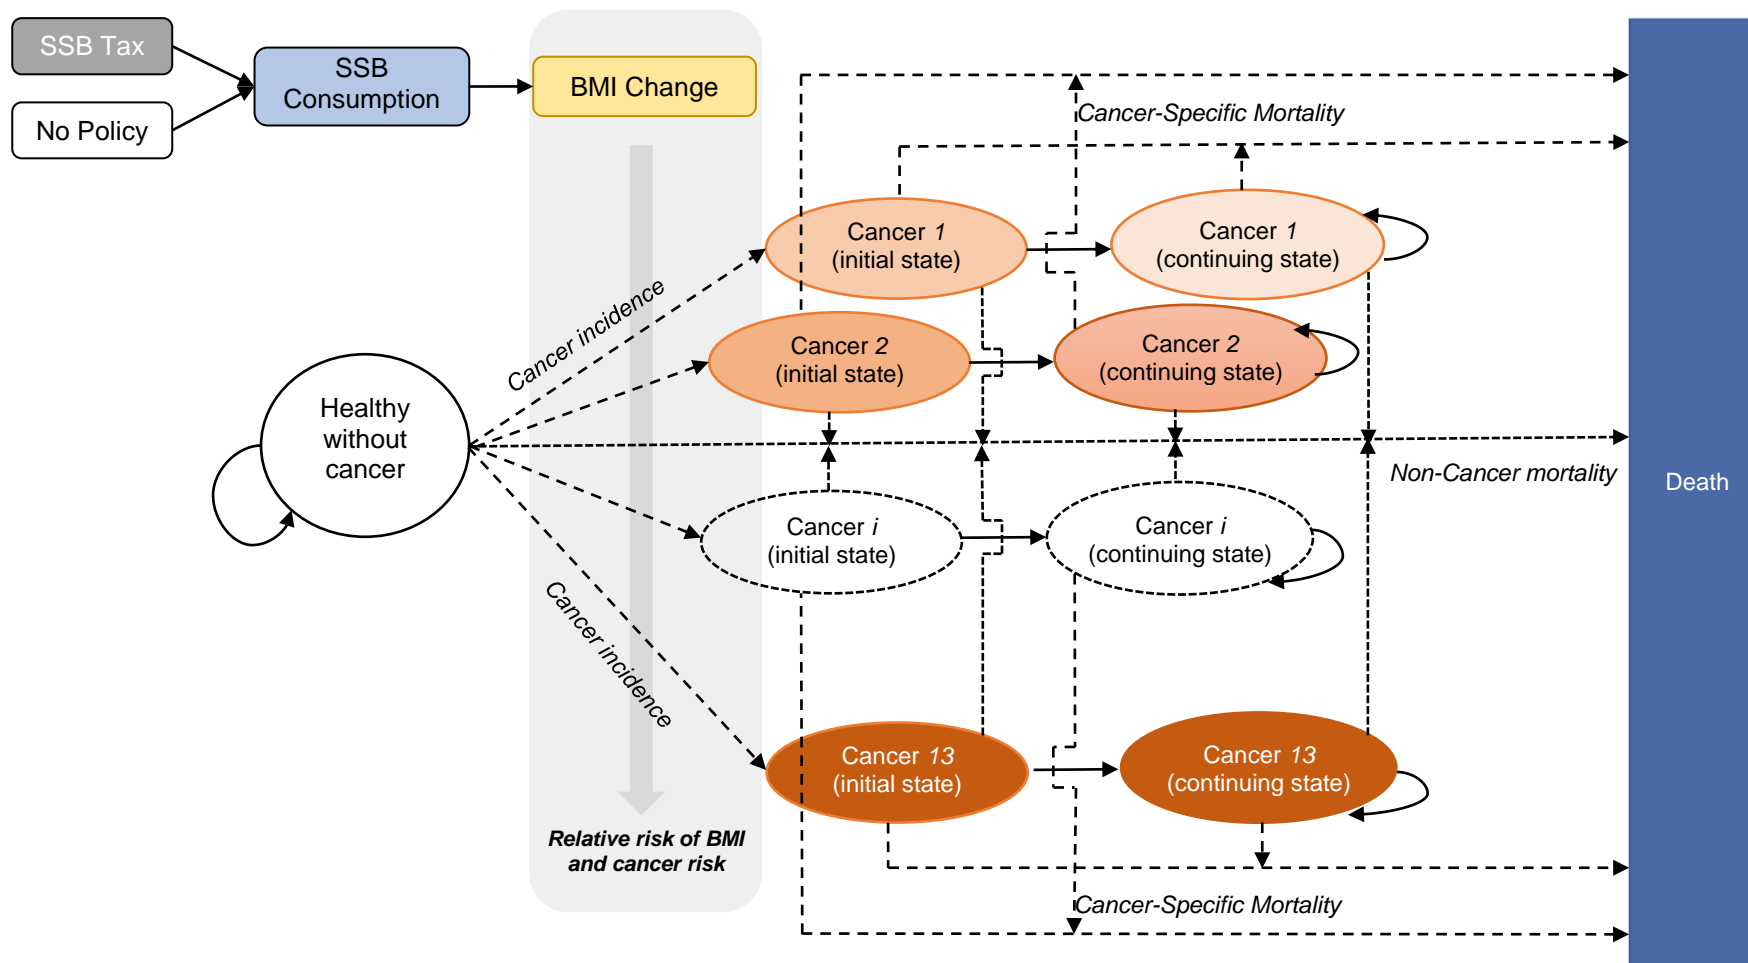

**Supplementary Figure S1. Diet and Cancer Outcome Model (DiCOM).** Abbreviations: SSB, sugar-sweetened beverage; BMI: body mass index. The model consists of four general health states: (a) healthy without cancer (healthy state); (b) initial cancer diagnosis (initial state) for each cancer type  $i$ ; (c) continuing care (continuing state) for each cancer type  $i$ ; and (d) death state. Transitions between states are based on national cancer incidence and cancer-specific mortality rates from SEER (for individuals with cancer) and lifetable-based mortality rates (for individuals without cancer). The model simulates the policy impact on the number of new cases and deaths of 13 obesity-associated cancers, health-related quality of life (HRQOL), and health-related costs among US adults over a lifetime by comparing a policy scenario (national penny-per-ounce SSB tax) to a non-policy scenario (status quo).

## References

1. Centers for Disease Control and Prevention. The CDC guide to strategies for reducing the consumption of sugar-sweetened beverages. *Atlanta: CDC*. 2010.
2. Centers for Disease Control and Prevention; National Center for Health Statistics. National Health and Nutrition Examination Survey Data. Accessed July 26, 2019.
3. Centers for Disease Control and Prevention; National Center for Health Statistics. National Health and Nutrition Examination Survey: Analytic Guidelines, 2011-2016. Accessed July 26, 2019.
4. Bowman S, Clemens J, Friday J, Lynch K, Moshfegh A. Food Patterns Equivalents Database 2013–14: Methodology and User Guide. *Beltsville, Maryland*. 2017.
5. Steinfeldt L, Anand J, Murayi T. Food reporting patterns in the USDA automated multiple-pass method. *Procedia Food Science*. 2013;2:145-156.
6. Toozé JA, Kipnis V, Buckman DW, et al. A mixed-effects model approach for estimating the distribution of usual intake of nutrients: the NCI method. *Statistics in medicine*. 2010;29(27):2857-2868.
7. Afshin A, Peñalvo JL, Del Gobbo L, et al. The prospective impact of food pricing on improving dietary consumption: a systematic review and meta-analysis. *PloS one*. 2017;12(3):e0172277.
8. Colchero MA, Rivera-Dommarco J, Popkin BM, Ng SW. In Mexico, evidence of sustained consumer response two years after implementing a sugar-sweetened beverage tax. *Health Affairs*. 2017;36(3):564-571.
9. Falbe J, Thompson HR, Becker CM, Rojas N, McCulloch CE, Madsen KA. Impact of the Berkeley excise tax on sugar-sweetened beverage consumption. *American journal of public health*. 2016;106(10):1865-1871.
10. Silver LD, Ng SW, Ryan-Ibarra S, et al. Changes in prices, sales, consumer spending, and beverage consumption one year after a tax on sugar-sweetened beverages in Berkeley, California, US: A before-and-after study. *PLoS medicine*. 2017;14(4):e1002283.
11. Wada R, Han E, Powell LM. Associations between soda prices and intake: Evidence from 24-h dietary recall data. *Food Policy*. 2015;55:54-60.
12. Green R, Cornelsen L, Dangour AD, et al. The effect of rising food prices on food consumption: systematic review with meta-regression. *BMJ (Clinical research ed)*. 2013;346:f3703.
13. Roberto CA, Lawman HG, LeVasseur MT, et al. Association of a beverage tax on sugar-sweetened and artificially sweetened beverages with changes in beverage prices and sales at chain retailers in a large urban setting. *Jama*. 2019;321(18):1799-1810.
14. Cawley J, Frisvold D, Hill A, Jones D. Oakland's sugar-sweetened beverage tax: Impacts on prices, purchases and consumption by adults and children. *Econ Hum Biol*. 2020;37:100865.
15. Powell LM, Leider J, Léger PT. The Impact of a Sweetened Beverage Tax on Beverage Volume Sold in Cook County, Illinois, and Its Border Area. *Ann Intern Med*. 2020.
16. Powell LM, Leider J. The impact of Seattle's Sweetened Beverage Tax on beverage prices and volume sold. *Econ Hum Biol*. 2020;37:100856.
17. Cawley J, Crain C, Frisvold D, Jones D. *The pass-through of the largest tax on sugar-sweetened beverages: the case of Boulder, Colorado*. National Bureau of Economic Research;2018. 0898-2937.
18. Centers for Disease Control and Prevention. United States Cancer Statistics (USCS). Public Use Databases Web site. <https://www.cdc.gov/cancer/uscs/public-use/>. Accessed.
19. Clegg LX, Hankey BF, Tiwari R, Feuer EJ, Edwards BK. Estimating average annual per cent change in trend analysis. *Statistics in medicine*. 2009;28(29):3670-3682.
20. Mariotto AB, Robin Yabroff K, Shao Y, Feuer EJ, Brown ML. Projections of the cost of cancer care in the United States: 2010–2020. *Journal of the National Cancer Institute*. 2011;103(2):117-128.
21. National Cancer Institute. Surveillance research Program. Measures of Cancer Survival. <https://surveillance.cancer.gov/survival/measures.html>.
22. Brenner H, Hakulinen T. Up-to-date and precise estimates of cancer patient survival: model-based period analysis. *American journal of epidemiology*. 2006;164(7):689-696.

23. Brenner H, Hakulinen T. Up-to-date cancer survival: Period analysis and beyond. *International journal of cancer*. 2009;124(6):1384-1390.
24. Framework A. Table 5.3 Cost of collection ratios (administrative costs/net revenue). In: *Tax Administration Comparative Information on OECD and Other Advanced and Emerging Economies*. 2013.
25. Aaron H, Gale W. *Economic effects of fundamental tax reform*. Brookings Institution Press; 2010.
26. City of Berkeley. Contract with Muniservices, LLC/Soda Tax Implementation. 2014.
27. Wilde P, Huang Y, Sy S, et al. Cost-Effectiveness of a US National Sugar-Sweetened Beverage Tax With a Multistakeholder Approach: Who Pays and Who Benefits. *American journal of public health*. 2019;109(2):276-284.
28. Powell L, Isgor Z, Rimkus L, Chaloupka F. Sugar-sweetened beverage prices: Estimates from a national sample of food outlets. *Health Policy Center, Institute for Health Research and Policy, University of Illinois at Chicago*. 2014.
29. Guy GP, Jr., Ekwueme DU, Yabroff KR, et al. Economic burden of cancer survivorship among adults in the United States. *Journal of clinical oncology : official journal of the American Society of Clinical Oncology*. 2013;31(30):3749-3757.
30. Hogan C, Lunney J, Gabel J, Lynn J. Medicare beneficiaries' costs of care in the last year of life. *Health affairs (Project Hope)*. 2001;20(4):188-195.
31. Mariotto AB, Yabroff KR, Shao Y, Feuer EJ, Brown ML. Projections of the cost of cancer care in the United States: 2010-2020. *Journal of the National Cancer Institute*. 2011;103(2):117-128.
32. Yabroff KR, Davis WW, Lamont EB, et al. Patient time costs associated with cancer care. *Journal of the National Cancer Institute*. 2007;99(1):14-23.
33. Yabroff KR, Guy GP, Jr., Ekwueme DU, et al. Annual patient time costs associated with medical care among cancer survivors in the United States. *Medical care*. 2014;52(7):594-601.
34. Zheng Z, Yabroff KR, Guy GP, Jr., et al. Annual Medical Expenditure and Productivity Loss Among Colorectal, Female Breast, and Prostate Cancer Survivors in the United States. *Journal of the National Cancer Institute*. 2016;108(5).
35. Yabroff KR, McNeel TS, Waldron WR, et al. Health limitations and quality of life associated with cancer and other chronic diseases by phase of care. *Medical care*. 2007;45(7):629-637.
36. Färkkilä N, Sintonen H, Saarto T, et al. Health-related quality of life in colorectal cancer. *Colorectal Disease*. 2013;15(5):e215-e222.
37. Zhou HJ, So JB, Yong WP, et al. Validation of the functional assessment of cancer therapy-gastric module for the Chinese population. *Health and quality of life outcomes*. 2012;10(1):145.
38. Naik H, Howell D, Su S, et al. EQ-5D Health Utility Scores: Data from a Comprehensive Canadian Cancer Centre. *The patient*. 2017;10(1):105-115.
39. Wildi SM, Cox MH, Clark LL, et al. Assessment of health state utilities and quality of life in patients with malignant esophageal Dysphagia. *The American journal of gastroenterology*. 2004;99(6):1044-1049.
40. Pickard AS, Jiang R, Lin HW, Rosenbloom S, Cella D. Using Patient-reported Outcomes to Compare Relative Burden of Cancer: EQ-5D and Functional Assessment of Cancer Therapy-General in Eleven Types of Cancer. *Clinical therapeutics*. 2016;38(4):769-777.
41. Müller-Nordhorn J, Roll S, Böhmig M, et al. Health-related quality of life in patients with pancreatic cancer. *Digestion*. 2006;74(2):118-125.
